# Supplementary material for: Identification of 3-hydroxy-2-(3-hydroxyphenyl)-4 H -1-benzopyran-4-ones as isoform-selective PKC-ζinhibitors and potential therapeutics for psychostimulant abuse
Source: Royal Society of Chemistry journal article supplement (doi:10.1039/b903036k), 2009-05-08

## Supporting Information

Identification of 3-Hydroxy-2-(3-Hydroxyphenyl)-4*H*-1-Benzopyran-4-ones as Isoform-  
Selective PKC- $\zeta$  Inhibitors and Potential Therapeutics for Psychostimulant Abuse

Langtian Yuan,<sup>a</sup> Jin-Soo Seo,<sup>b</sup> Nam Sook Kang,<sup>b</sup> Shahar Keinan,<sup>a</sup> Sarah E. Steele,<sup>a</sup> Gregory A.  
Michelotti,<sup>c</sup> William C. Wetsel,<sup>d,e</sup> David N. Beratan,<sup>a,f</sup> Young-Dae Gong,<sup>b</sup> Tong H. Lee<sup>e</sup> and  
Jiyong Hong\*<sup>a</sup>

<sup>a</sup>Department of Chemistry, Duke University, Durham, North Carolina 27708, USA.

<sup>b</sup>Medicinal Science Division, Korea Research Institute of Chemical Technology, Daejeon 305-  
600, Korea.

<sup>c</sup>Department of Anesthesiology, Duke University Medical Center, Durham, North Carolina  
27710, USA.

<sup>d</sup>Department of Cell Biology and Neurobiology, Duke University Medical Center, Durham,  
North Carolina 27710, USA.

<sup>e</sup>Department of Psychiatry and Behavioral Sciences, Duke University Medical Center, Durham,  
North Carolina 27710, USA.

<sup>f</sup>Department of Biochemistry, Duke University Medical Center, Durham, North Carolina 27710,  
USA.

\* To whom correspondence should be addressed to:

E-mail: jiyong.hong@duke.edu; Fax: 1-919-660-1605 Tel: 1-919-660-1545

| <b>Contents</b>                       | <b>Page Number</b> |
|---------------------------------------|--------------------|
| Experimental Section                  | S2                 |
| ClustalW2 Multiple Sequence Alignment | S5                 |
| Copies of <sup>1</sup> H and LC-MS    | S7                 |

### ***In vitro* Kinase Assay**

After incubating purified PKC- $\zeta$  (Millipore) with 5  $\mu$ M (final concentration) of heterocyclic small molecule libraries and additional PKC reaction components (50 mM Tris/HCl (pH 7.5), 5 mM MgCl<sub>2</sub>, 100  $\mu$ M Na<sub>3</sub>VO<sub>4</sub>, 100  $\mu$ M Na<sub>4</sub>P<sub>2</sub>O<sub>7</sub>, 1 mM NaF, 100  $\mu$ M PMSF, 2  $\mu$ g phosphatidylserine, and 40  $\mu$ M PKC substrate), 50  $\mu$ M-ATP (final concentration) was added to initiate the reactions (50  $\mu$ L total reaction volume). After 30-min incubation at 30 °C, 50  $\mu$ L of Kinase-Glo Plus Reagent (Promega) was added to each well. The plate was mixed and incubated at room temperature for 10 min. The luminescence signal was measured on a Perkin Elmer Victor Multilabel Plate Reader. Chelerythrine, a potent PKC- $\zeta$  inhibitor, was used in the assay as a positive control.

### **Cellular Viability Assay**

Cos-7 cells were seeded in 48-well culture plates ( $2 \times 10^4$  per well), 24 h later cells were treated with drugs (15  $\mu$ M) or vehicle control (DMSO) for 24 and 48 h in DMEM supplemented with 10% serum. At the end of the incubation period, the survival of cells was determined by the MTT assay, as per manufacturer's recommendation (Cayman Biochemicals, Ann Arbor, MI). Briefly, 10% volume of MTT was added to each well and samples were incubated for 3 h, culture medium was aspirated and replaced with 100  $\mu$ L of formazan dissolving solution. Colorimetric intensity was quantified using an ELISA reader at 570 nm. Values were obtained after subtraction of matched blanks and the ODs of vehicle controls were taken as 100% and values for drug treatment are expressed as % of control.

### **PKC Immunoprecipitation Enzymatic Assay**

One million Cos-7 cells were plated on 10 cm tissue culture dishes and allowed to attach for 6 h. Cells were then infected with adenovirus harboring the human PKC- $\zeta$  gene at an moi of 10 in complete DMEM. After 3 h, media was replaced with fresh complete DMEM and cells were allowed to grow an additional 21 h. PKC- $\zeta$  expressing Cos-7 cells were subsequently harvested by scraping and incubated for 30 min at 4 °C in lysis buffer A [20 mM HEPES (pH 7.4), 10 mM EDTA, 125 mM NaCl, 1 mM DTT, 1 mM sodium orthovanadate, 0.5 mg/ml benzamidine, 1% NP40] in the presence of protease inhibitors [0.1 mM phenylmethylsulfonylfluoride, 10  $\mu$ g/ml aprotinin, 2.5  $\mu$ g/ml pepstatin, 5  $\mu$ g/ml leupeptin]. Samples were centrifuged at  $12,000 \times g$  for 15

min, and 10 mg of supernatant was used for immunoprecipitation using 1  $\mu$ g of PKC- $\zeta$  polyclonal antibody (C-20 epitope; Santa Cruz) and 20  $\mu$ L of protein A-Sepharose beads (Roche). PKC-containing immunoprecipitates were washed three times in buffer A, followed by incubation at 32  $^{\circ}$ C for 15 min in a total volume of 40  $\mu$ L with buffer B [0.5 mM EGTA, 12.5 mM MgCl<sub>2</sub>, 20 mM HEPES (pH 7.5)] containing test compounds (15  $\mu$ M), 30  $\mu$ g of PKC- $\zeta$  specific substrate (MBP4-14; Calbiochem), and 10  $\mu$ Ci [ $\gamma$ -<sup>32</sup>P] ATP (1.5  $\mu$ Ci/tube). Samples were immobilized onto P81 phosphocellulose paper and washed extensively in 0.75% phosphoric acid buffer and retained radioactivity was quantitated by liquid scintillation.

### Docking Simulation

The structures for the compounds were energy minimized and conformational analysis was carried out using the Catalyst ConForm algorithm implemented in the Accelrys Discovery Studio 2.1 suite from Accelrys Inc. (San Diego, CA, [www.accelrys.com](http://www.accelrys.com)). Docking studies were also performed using the LigandFit programs implemented in the Accelrys Discovery Studio 2.1. In the current docking studies using LigandFit, the binding site was generated from the co-crystallized ligand within the targeted protein from the protein data bank (code : 1ZRZ).<sup>1</sup> The co-crystallized structure of PKC- $\iota$  and BIM1 was used as a reference structure for docking studies because of the similarity with PKC- $\zeta$ .<sup>1</sup> LigandFit parameters were set to the default values. Interaction energies were estimated using the Drieding force field with a non-bonded interaction cutoff distance of 10.0  $\text{\AA}$  and a distance dependent dielectric constant. A maximum of 10 poses with interaction energies  $\leq$  20.0 kcal/mol and RMS similarity threshold of 1.5  $\text{\AA}$  for each compound were saved. Each of optimal poses was evaluated and prioritized according to the DockScore function based on the Piecewise Linear Potential function (PLP).

### QM/MM Calculation

The algorithm used the 1ZRZ.pdb<sup>1</sup> file from the PDB repository. Only two water molecules (those closest to the active site) from the X-ray crystal structure were included. All other water molecules were removed. Hydrogen atoms were added and side chain flips of GLN, HIS, and ASN were corrected with molprobit.<sup>2</sup> 3D structures of the inhibitors were built using SMILES as input to the BALLOON program<sup>3</sup> that creates 3-D conformers of each ligand. The geometry of each conformer was optimized using the semi-empirical AM1 method, as implemented in

CHARMM.<sup>4</sup> The optimized geometry was then superimposed on the BIM1 original ligand located in the 1ZRZ.pdb active site. Two orientations were examined for each conformer (**Fig. S1**). In CHARMM, the position of the protein hydrogen atoms were energy minimized (while all other atom positions were constrained). Next, the atomic positions of the inhibitor conformer were geometry optimized based on AM1 energies (while all other protein atoms were constrained). Throughout the calculation, the protein was described using the CHARMM force field, the inhibitor with an AM1 Hamiltonian, and the water atoms with the TIP3 force field.

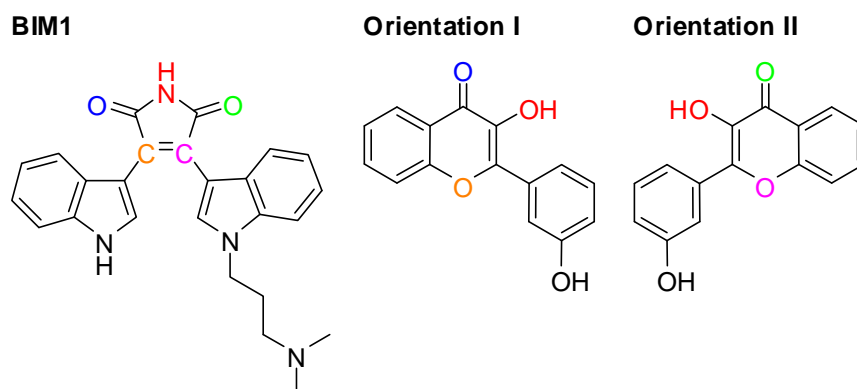

**Fig. S1** The two poses were tested for each of 1–3 in the QM/MM analysis. Atoms were overlapped based on color coding, for example, the 4-keto group (C=O) was placed on top of the BIM1 oxygen with the same color. For simplicity, shown here is only compound 2.

## References

1. A. Messerschmidt, S. Macieira, M. B. Velarde, C. Benda, A. Jestel, T. N. Brandstetter and M. Blaesse, *J. Mol. Biol.*, 2005, **352**, 918.
2. I. W. Davis, L. W. Murray, J. S. Richardson and D. C. Richardson, *Nucleic Acids Res.*, 2007, **35**, W375.
3. M. J. Vainio and M. S. Johnson, *J. Chem. Info. Mod.*, 2007, **47**, 2462.
4. B. R. Brooks, R. E. Bruccoleri, B. D. Olafson, D. J. States, S. Swaminathan and M. Karplus, *J. Comp. Chem.*, 1983, **4**, 187; A. D. MacKerell, Jr., B. Brooks, C. L. Brooks, III, L. Nilsson, B. Roux, Y. Won and M. Karplus, in *The Encyclopedia of Computational Chemistry*, eds. P. v. R. Schleyer et al., John Wiley & Sons, Chichester, 1998, vol. 1, pp. 271–277.

### ClustalW2 Multiple Sequence Alignment

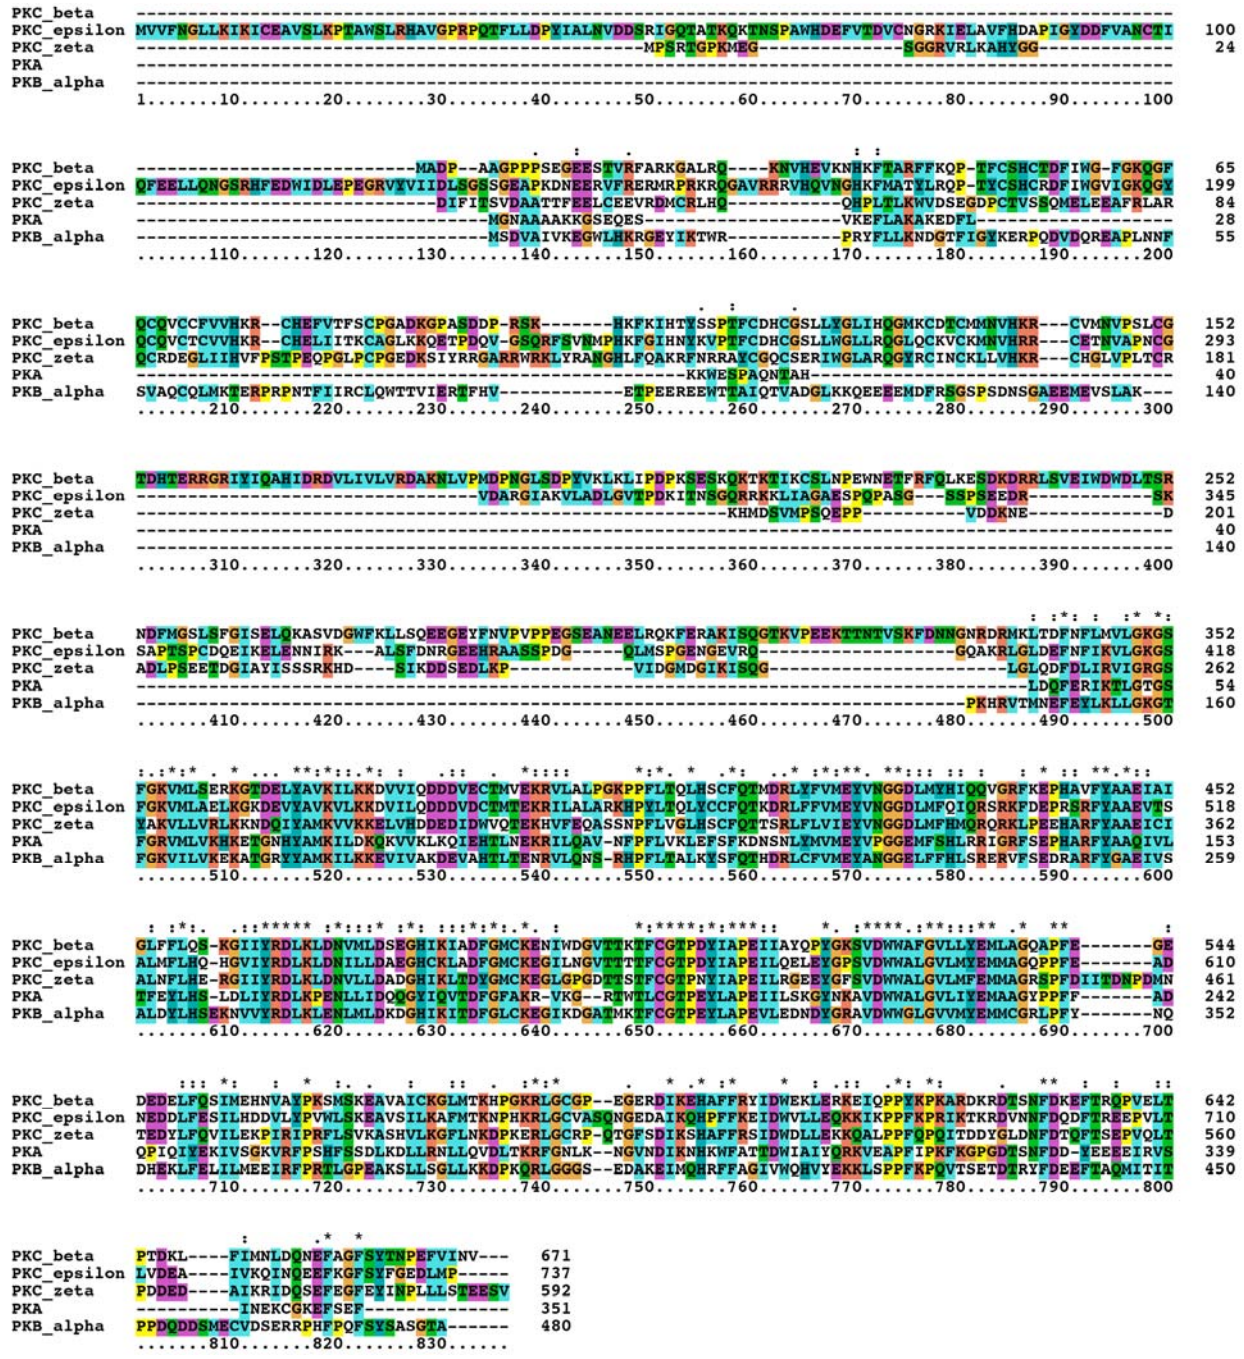

1. Database Accession Number

PKC- $\beta$ 2: GenBank X07109; PKC- $\epsilon$ : GenBank X65293; PKC- $\zeta$ : GenBank BC014270;  
PKA: GenBank X07767; PKB- $\alpha$ : SWISS-PROT P31749

2. The following symbols denotes the degree of conservation observed in each column:

- "\*" means that the residues or nucleotides in that column are identical in all sequences in the alignment.
- ":" means that conserved substitutions have been observed, according to the COLOR table below.
- "." means that semi-conserved substitutions are observed.

3. The red color is used for the small and hydrophobic amino acids, AVFPMILW; the blue color is used for acidic amino acids, DE; the magenta color is used for basic amino acid, RK; and the green color is used for the rest amino acids, STYHCNGQ.

COMPOUND 1

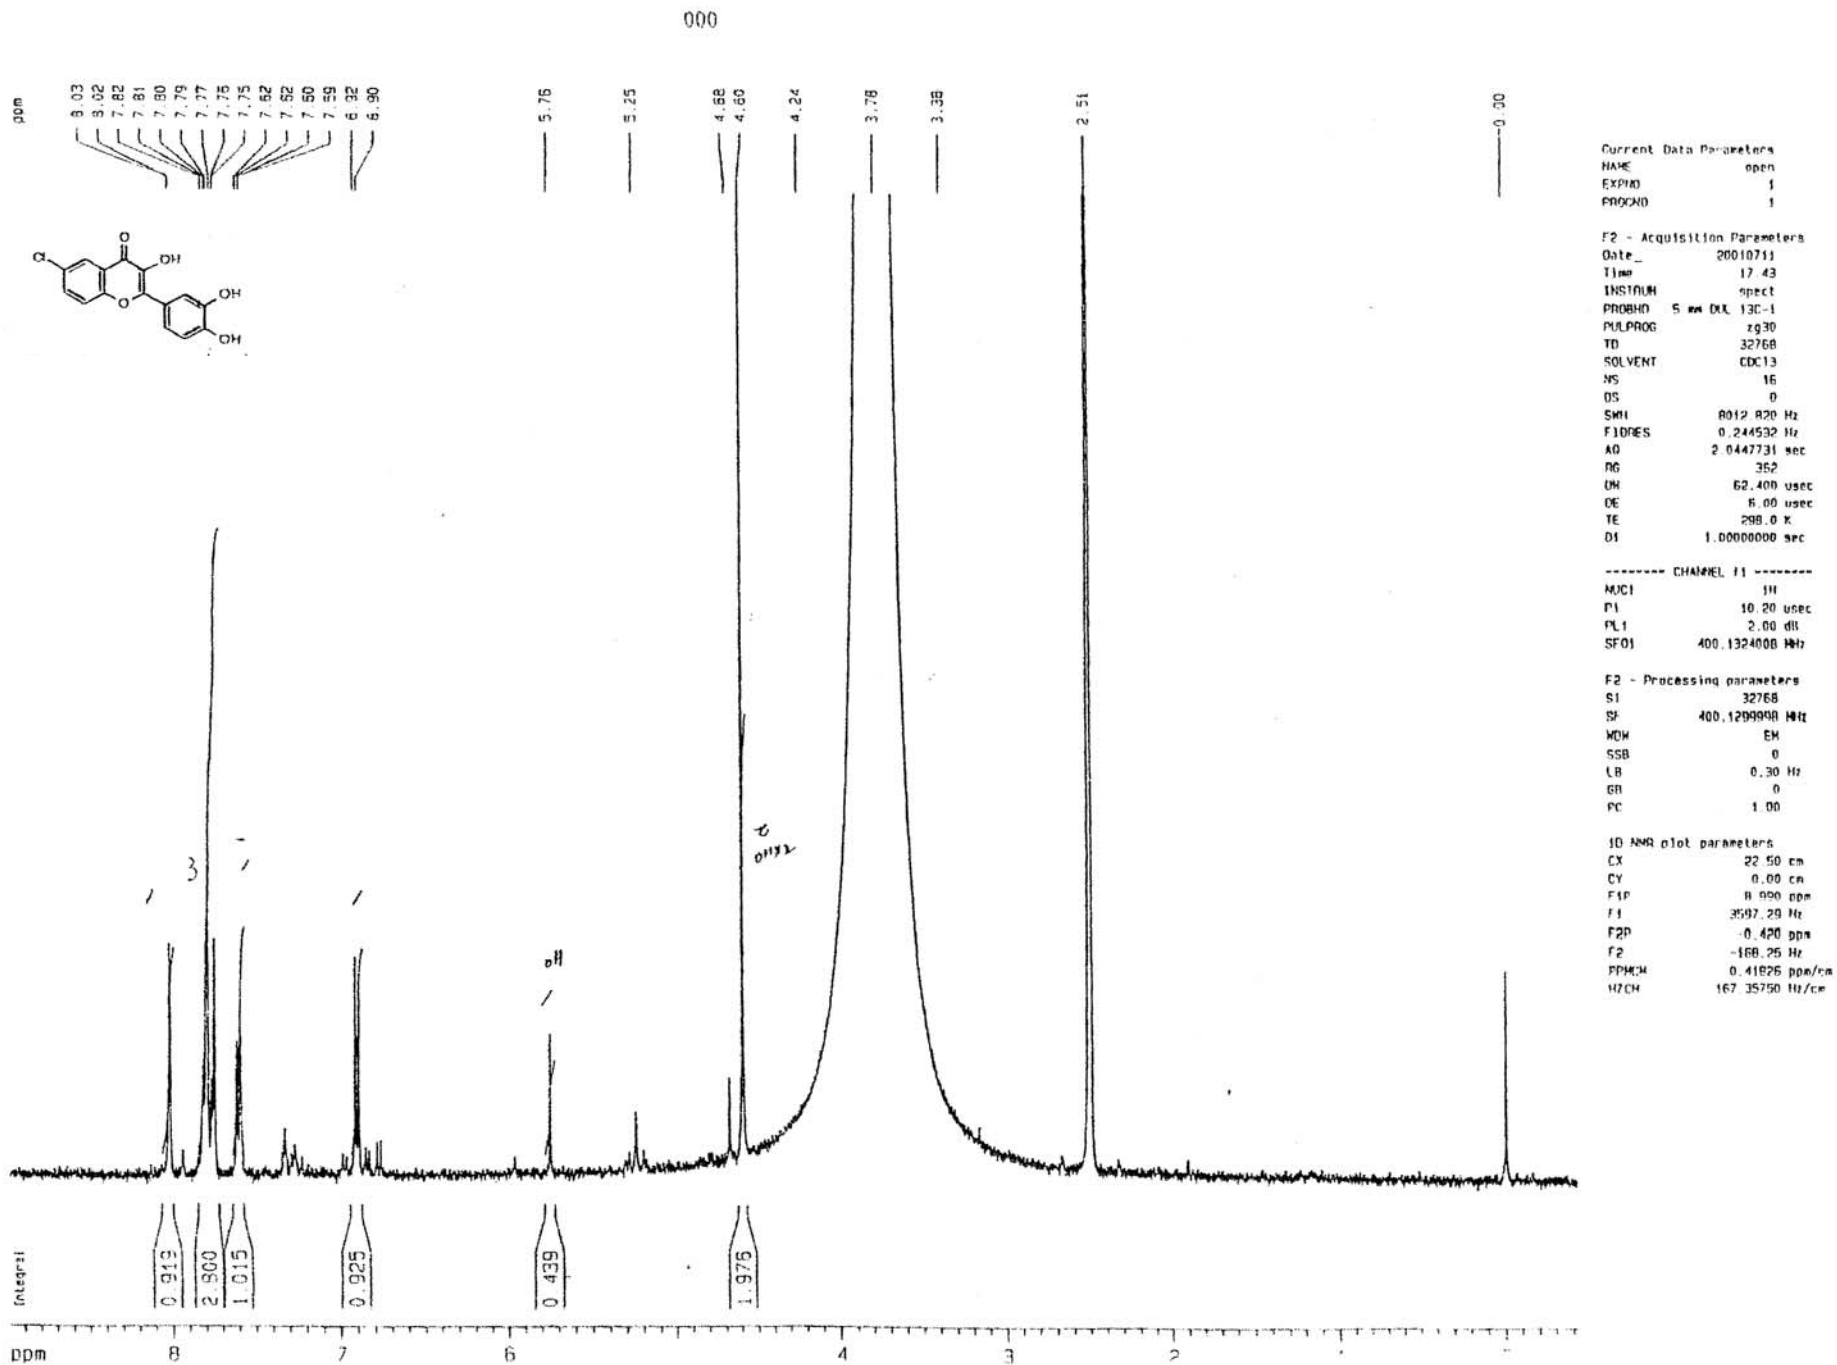

COMPOUND 1

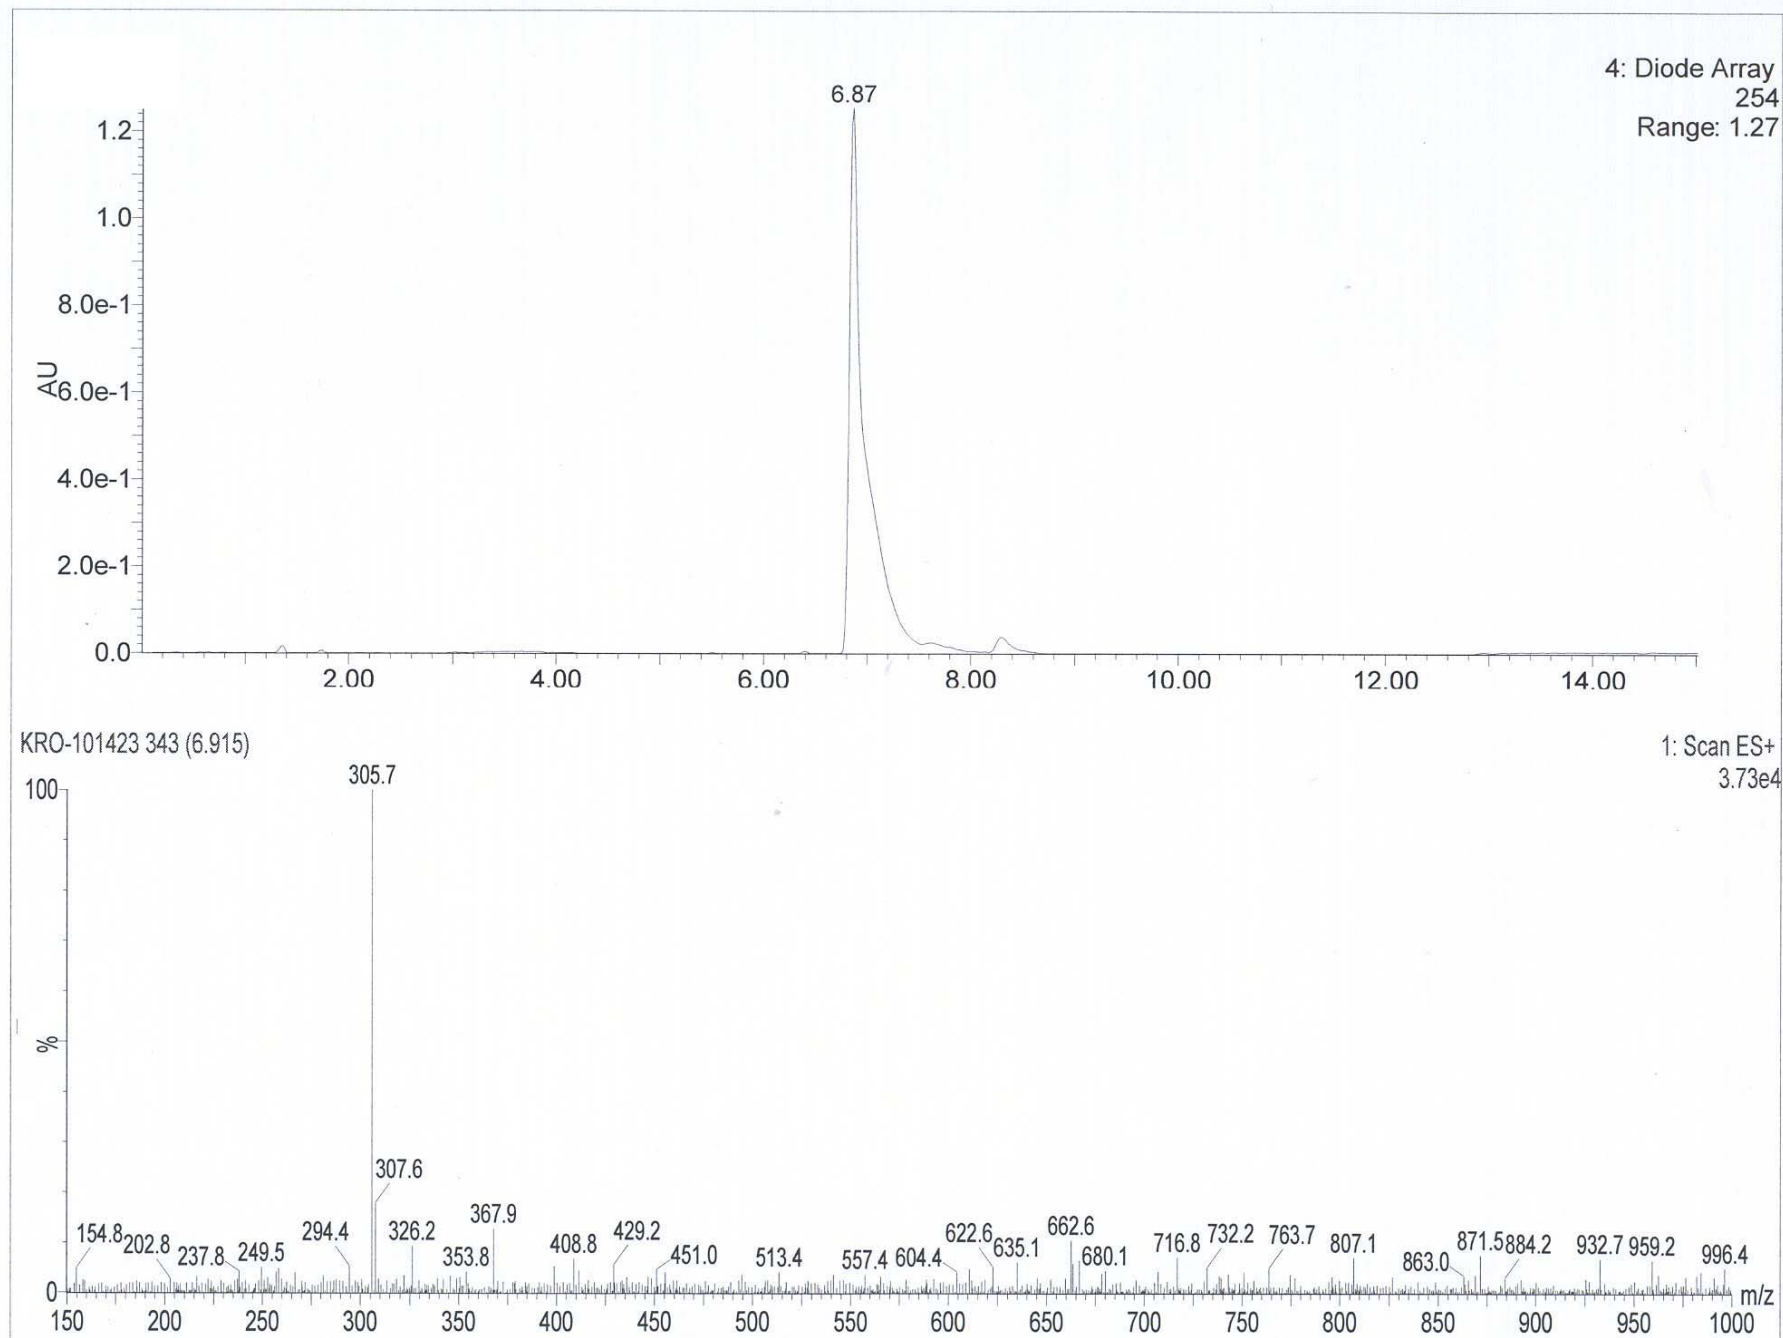



COMPOUND 2

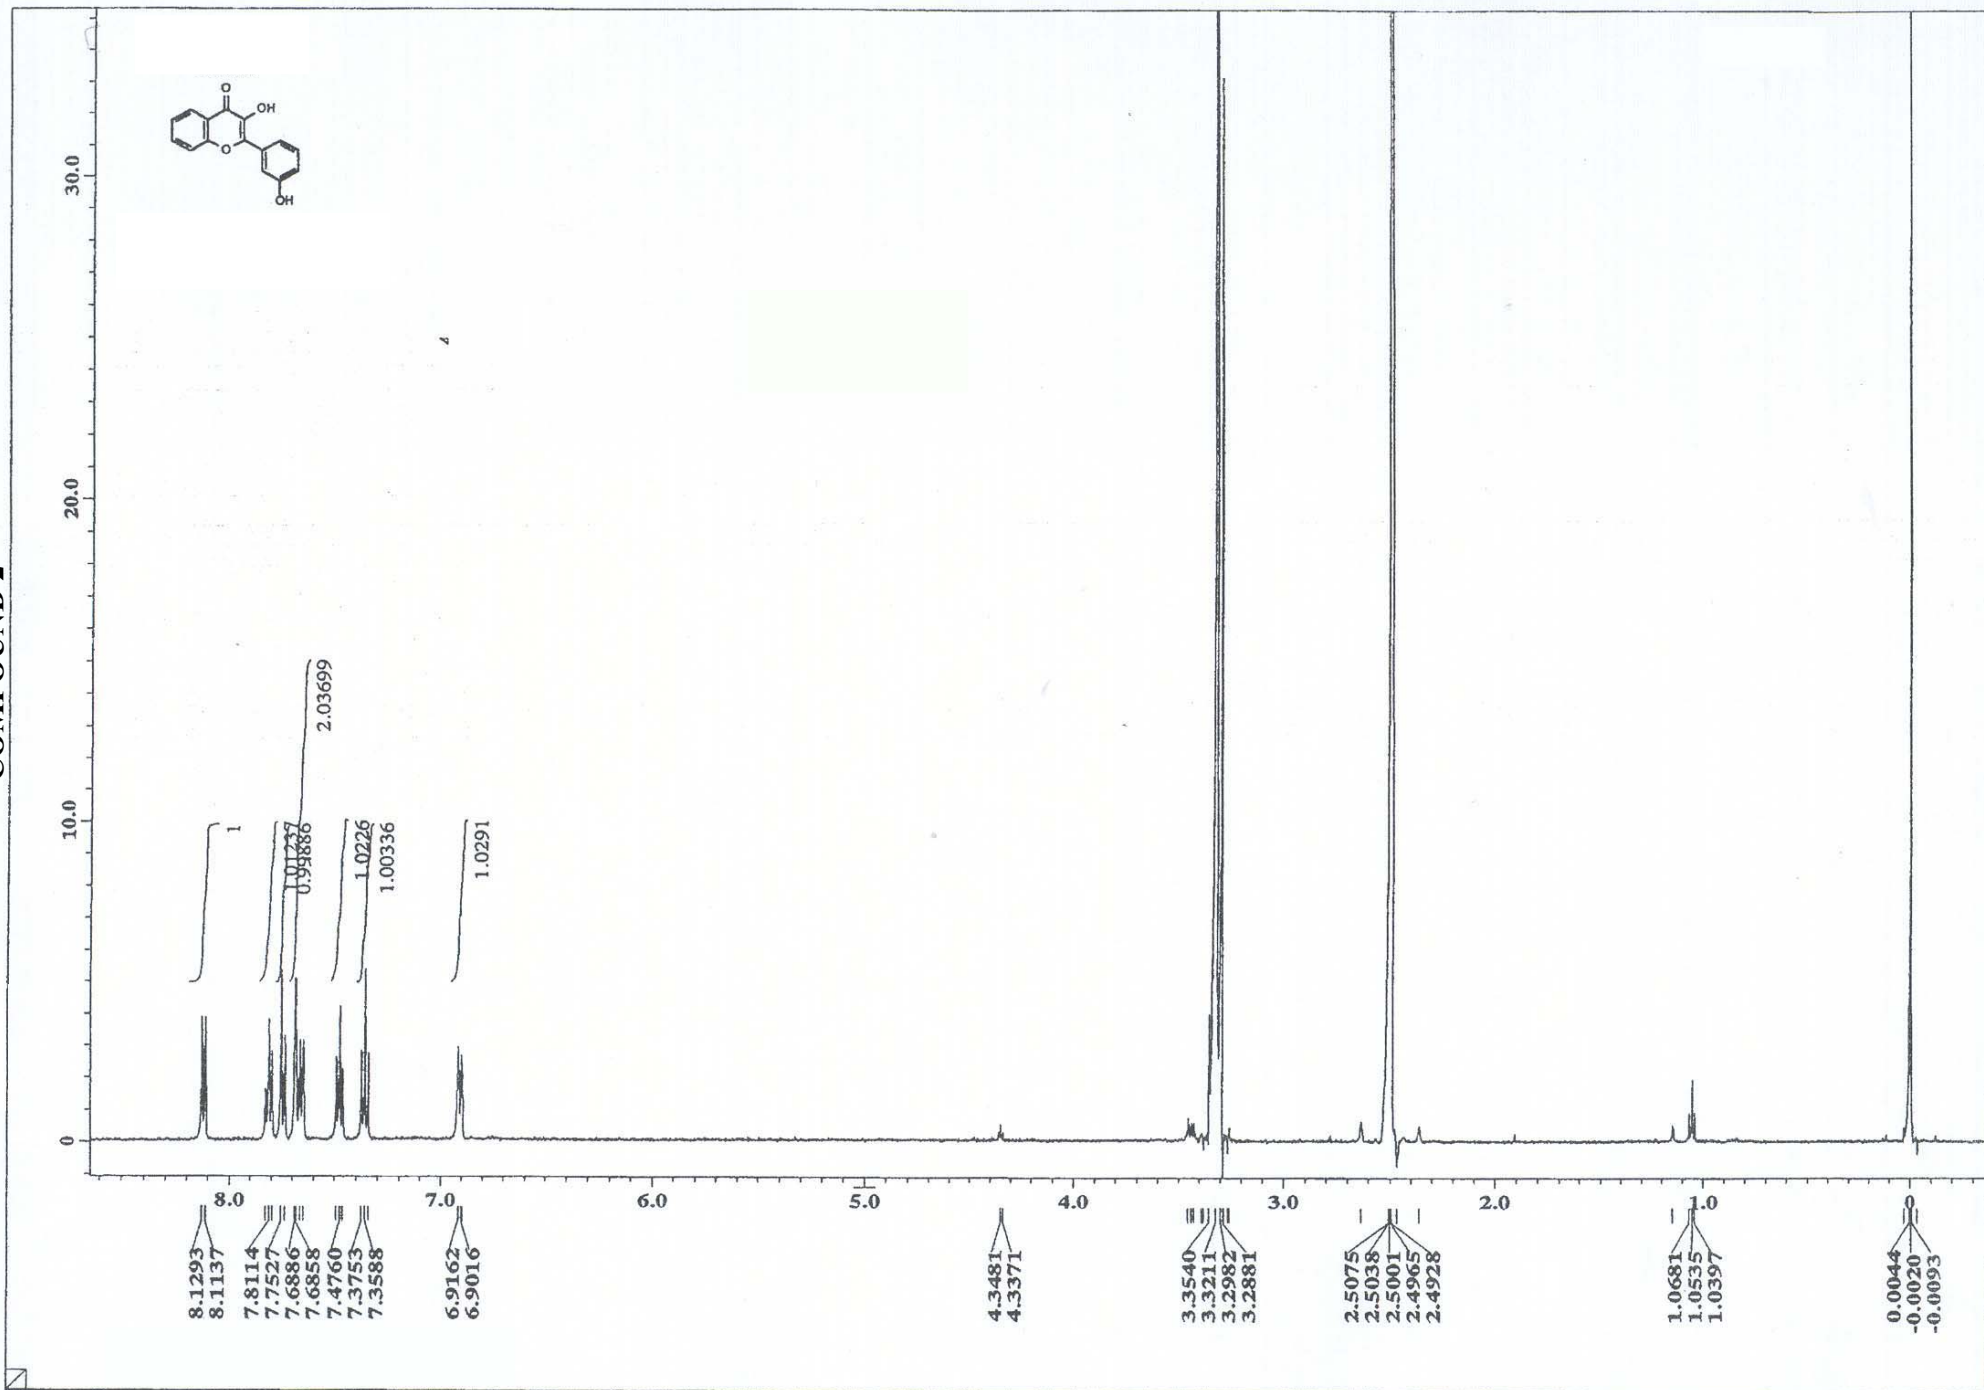

COMPOUND 2

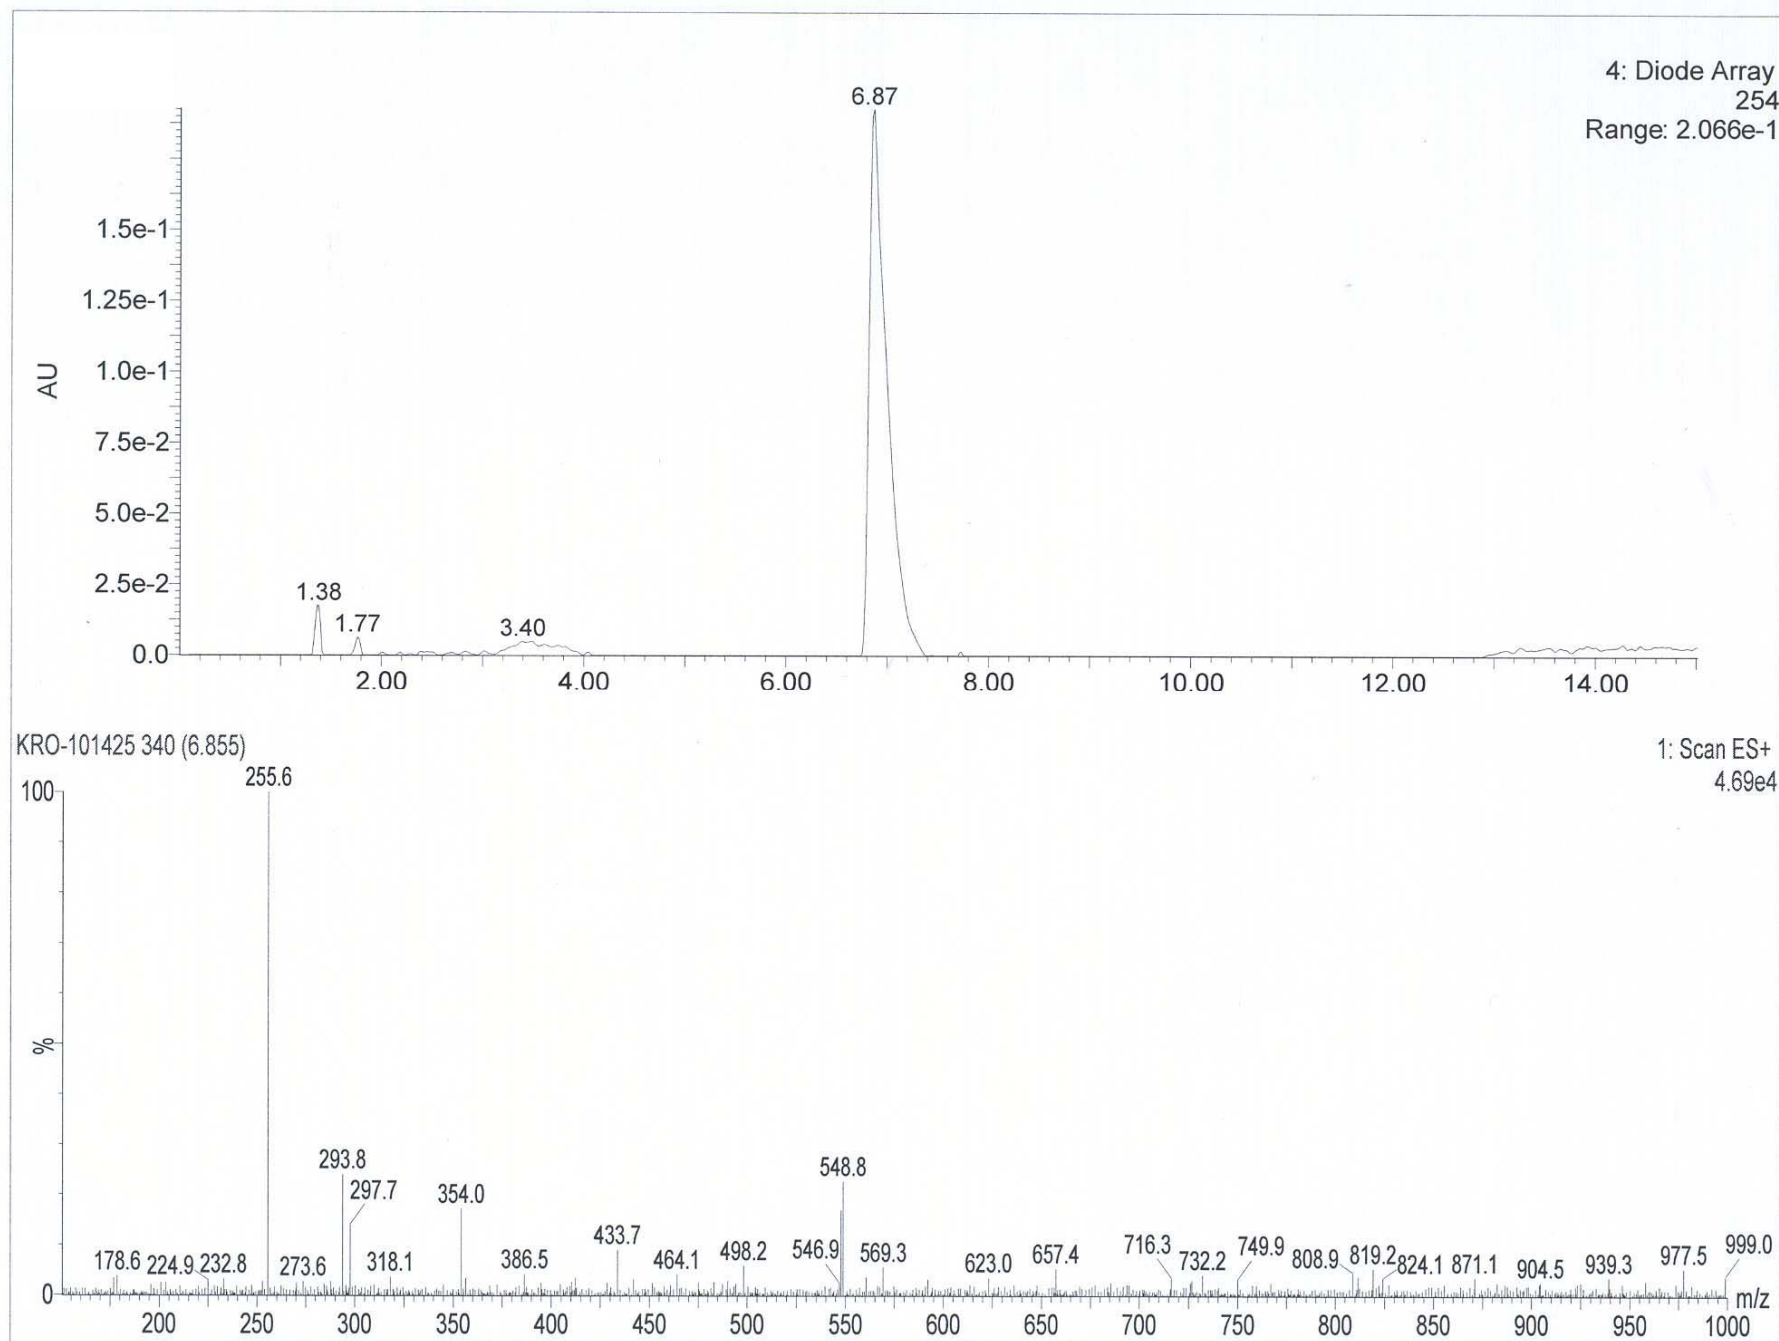

COMPOUND 3

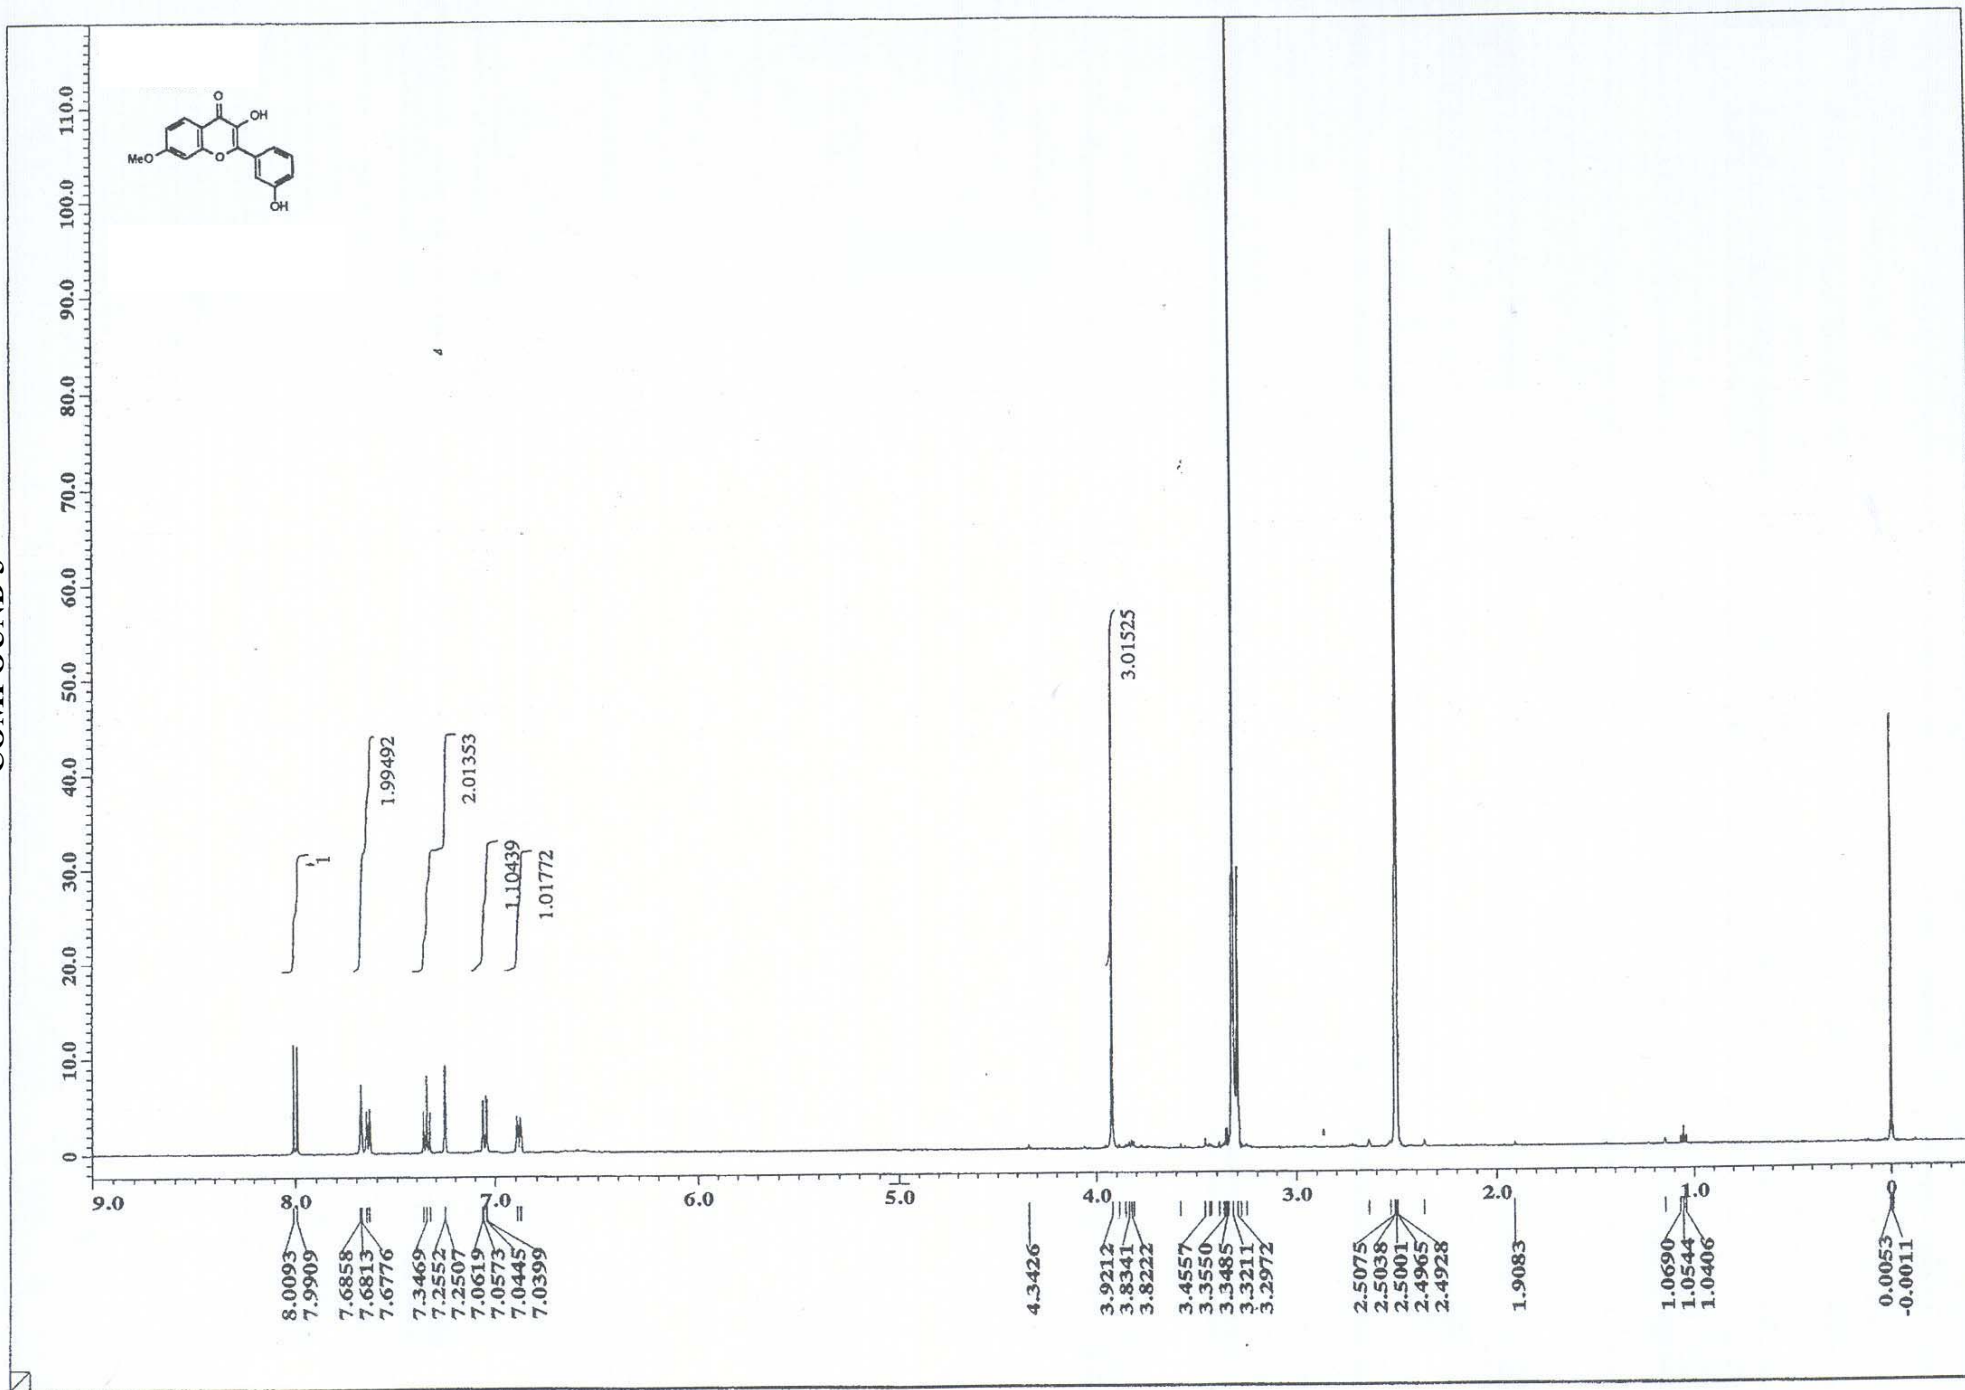

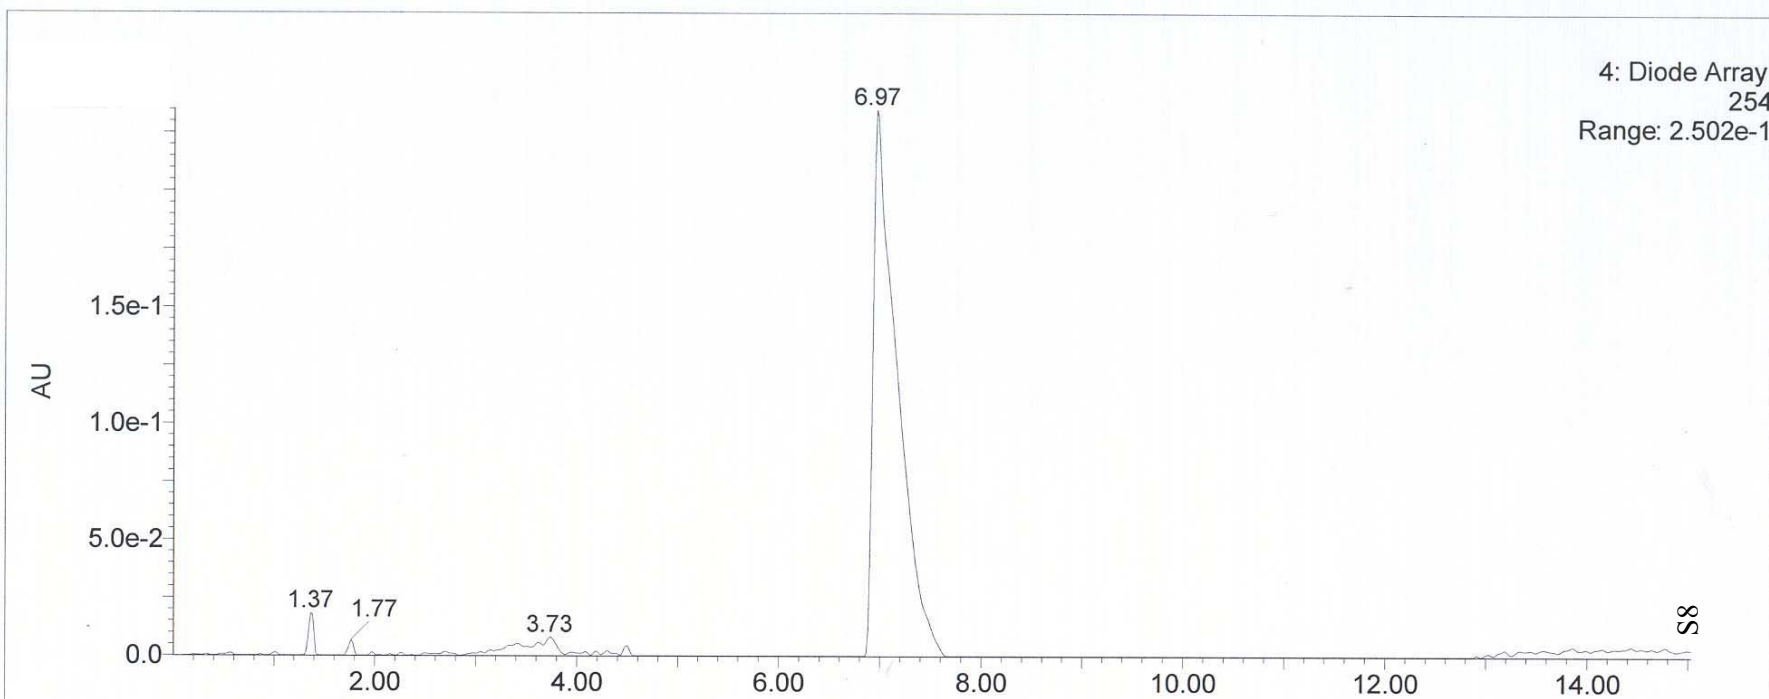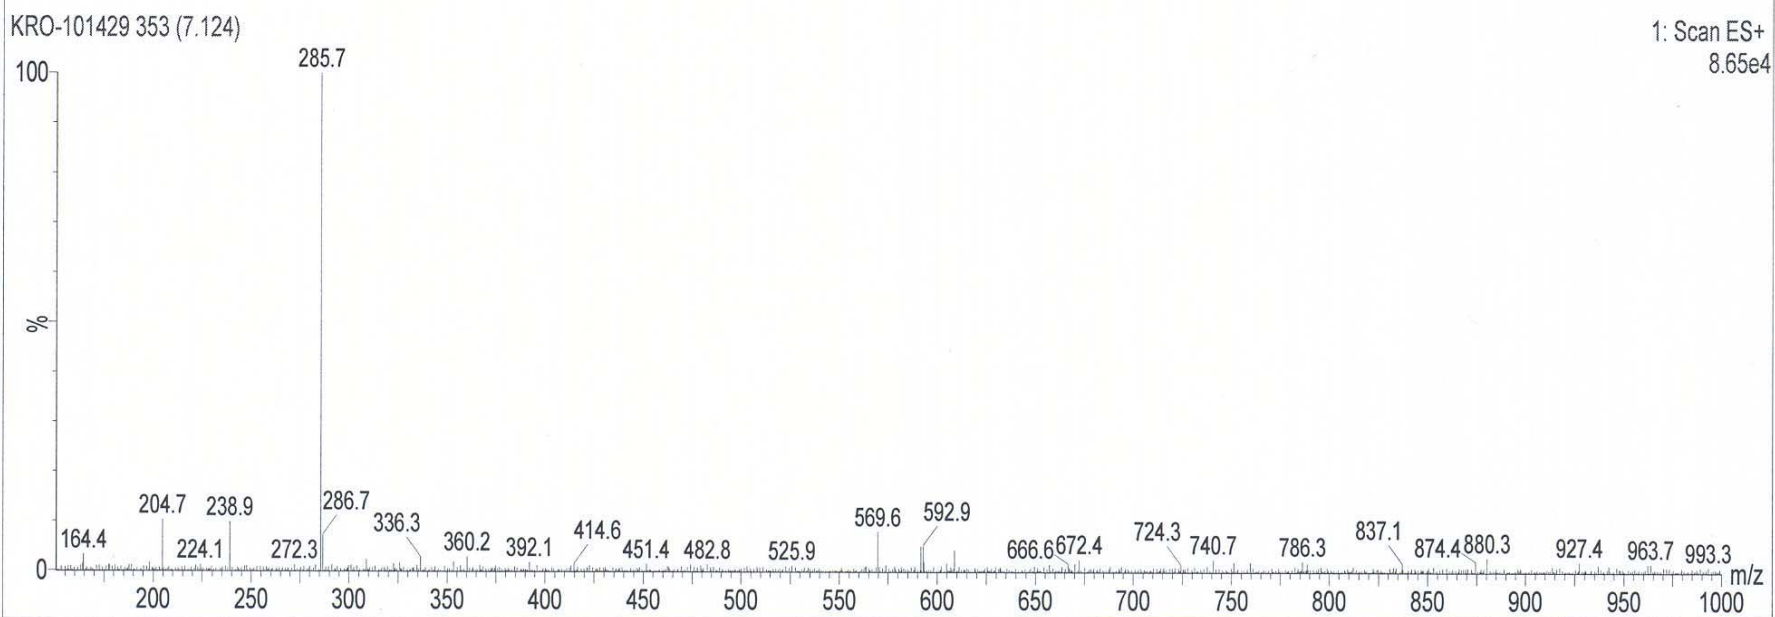

COMPOUND 4

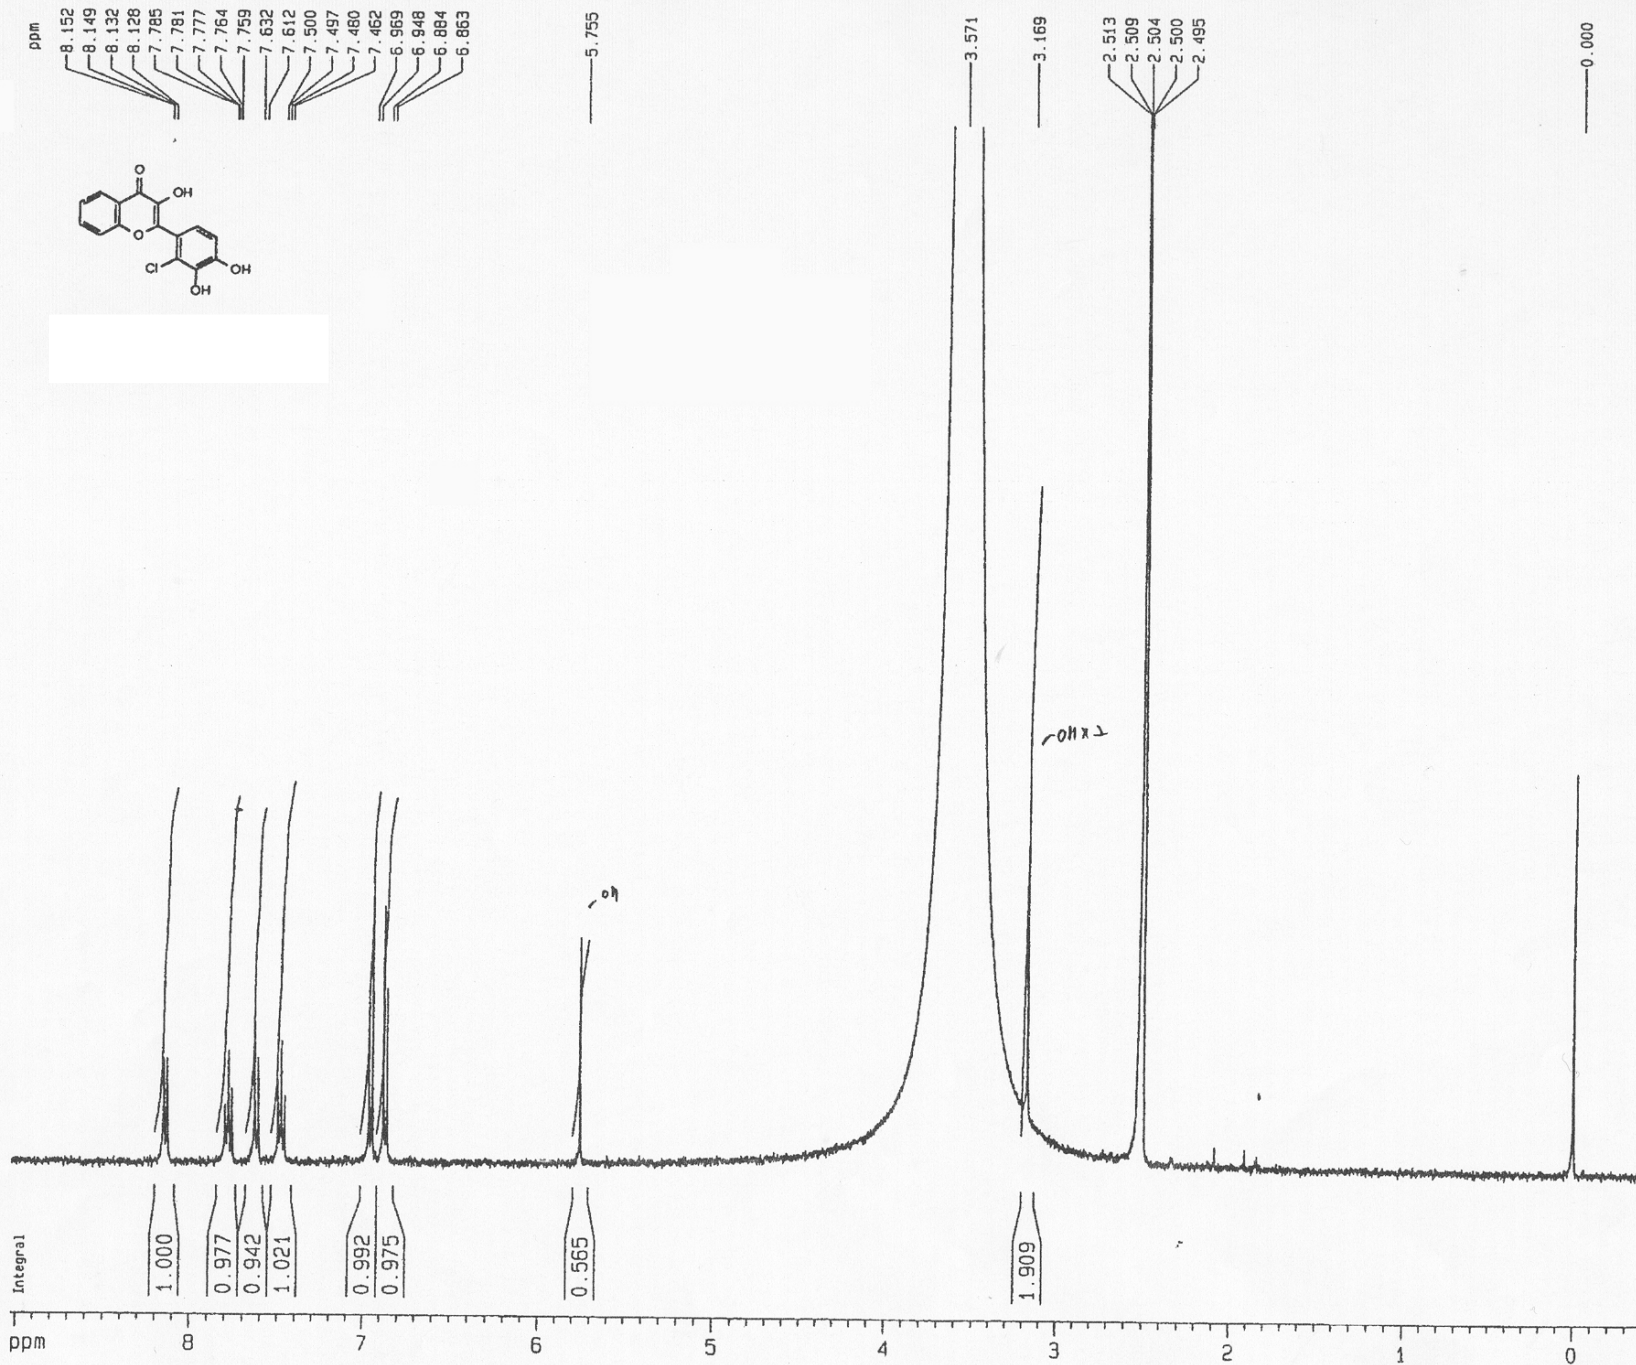

Current Data Parameters  
 NAME open  
 EXPNO 1  
 PROCNO 1

F2 - Acquisition Parameters  
 Date\_ 20010711  
 Time 17.38  
 INSTRUM spect  
 PROBHD 5 mm DUL 13C-1  
 PULPROG zg30  
 TD 32768  
 SOLVENT CDC13  
 NS 16  
 DS 0  
 SWH 8012.820 Hz  
 FIDRES 0.244532 Hz  
 AQ 2.0447731 sec  
 RG 456.1  
 DW 62.400 usec  
 DE 6.00 usec  
 TE 298.0 K  
 D1 1.00000000 sec

----- CHANNEL f1 -----  
 NUC1 1H  
 P1 10.20 usec  
 PL1 2.00 dB  
 SFO1 400.1324008 MHz

F2 - Processing parameters  
 SI 32768  
 SF 400.1300005 MHz  
 WDM EM  
 SSB 0  
 LB 0.30 Hz  
 GB 0  
 PC 1.00

10 NMR plot parameters  
 CX 22.50 cm  
 CY 0.00 cm  
 F1P 9.029 ppm  
 F1 3512.67 Hz  
 F2P -0.402 ppm  
 F2 -160.90 Hz  
 PPMCM 0.41915 ppm/cm  
 HZCM 167.71436 Hz/cm

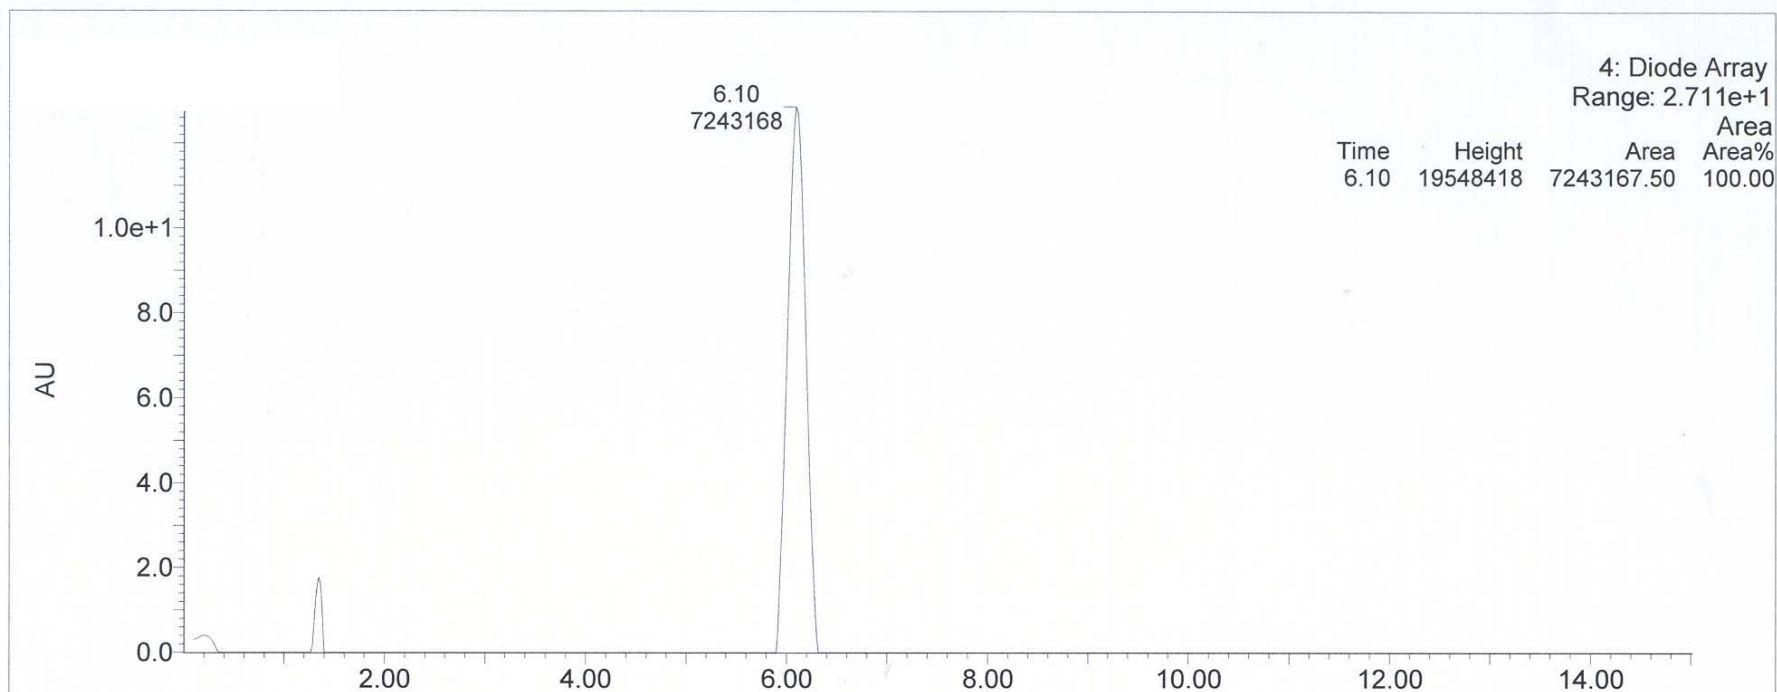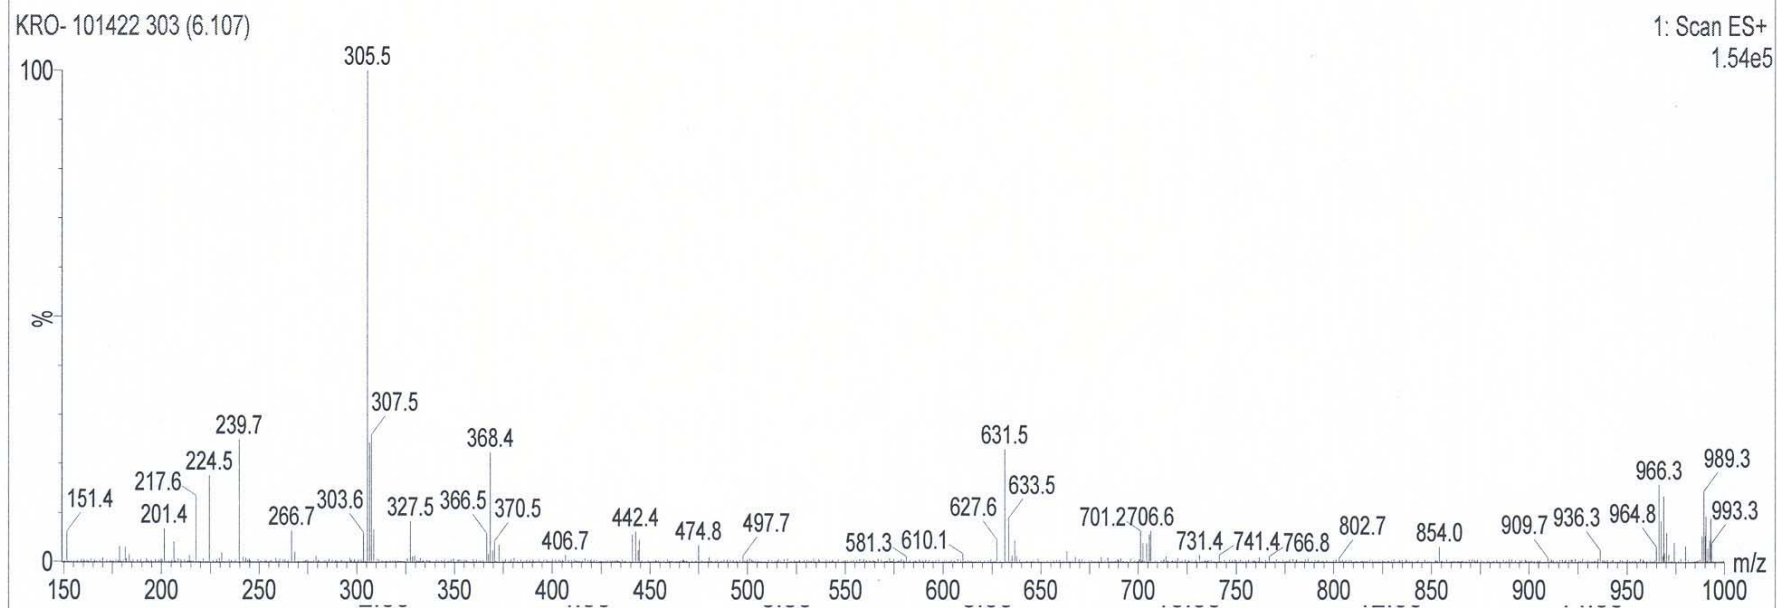

Supplement: b903036k.pdf [file b903036k.pdf]
